# Supplementary material for: Combining Pathway Identification and Breast Cancer Survival Prediction via Screening-Network Methods
Source: Front Genet. 2018 Jun 14;9:206. doi: 10.3389/fgene.2018.00206 (PMC6011013; doi:10.3389/fgene.2018.00206)
Supplement: Supplementary file 1 [file Table_1.XLSX]

## Sheet: TableS1
Table S1: ﻿List of genes associated to breast cancer in HEFaIMp tool with p-value < 0.05 for mRNA expression data and the integration of mRNA and CNAs data.
	mRNA DATA	mRNA+CNAs DATA
	ABCE1	ABCE1
	ACACA	ACACA
	ACRV1	ACRV1
	ACSM3	ACSM3
	ACTL8	ACTL8
	ACVR1B	ACVR1B
	ADCY2	ADCY2
	ADCYAP1	ADCYAP1
	ADH6	ADH6
	ADORA1	ADORA1
	ADRA1A	ADRA1A
	AFF2	AFF2
	AFF3	AFF3
	AHSG	AHSG
	AKAP6	AKAP6
	AKT2	AKT2
	ALB	ALB
	ALDH3B2	ALDH3B2
	ALDOB	ALDOB
	ALK	ALK
	AMHR2	AMHR2
	AMMECR1	AMMECR1
	ANGPT1	ANGPT1
	AP4E1	AP4E1
	APC	APC
	APOB	APOB
	APOBEC1	APOBEC1
	AR	AR
	ARHGAP11A	ARHGAP11A
	ARHGEF12	ARHGEF12
	ARHGEF16	ARHGEF16
	ARID4B	ARID4B
	ART1	ART1
	ARVCF	ARVCF
	ASCL1	ASCL1
	ASF1B	ASF1B
	ASIP	ASIP
	ASPM	ASPM
	ATF7	ATF7
	ATP2B2	ATP2B2
	ATP4B	ATP4B
	ATP6V0A2	ATP6V0A2
	ATP8A2	ATP8A2
	ATXN3	ATXN3
	AURKA	AURKA
	AURKB	AURKB
	AVPR1A	AVPR1A
	B4GALNT1	B4GALNT1
	B4GALT6	B4GALT6
	BARX2	BARX2
	BCL2	BCL2
	BIRC5	BIRC5
	BLM	BLM
	BMP10	BMP10
	BMP5	BMP5
	BRAF	BRAF
	BRCA1	BRCA1
	BRCA2	BRCA2
	BRS3	BRS3
	BRWD1	BRWD1
	BTC	BTC
	BUB1	BUB1
	BUB1B	BUB1B
	CACNB4	CACNB4
	CALCB	CALCB
	CASP2	CASP2
	CASR	CASR
	CBL	CBL
	CCKAR	CCKAR
	CCNA2	CCNA2
	CCNB2	CCNB2
	CCNE1	CCNE1
	CCNE2	CCNE2
	CCNF	CCNF
	CCR3	CCR3
	CCR4	CCR4
	CDC14A	CDC14A
	CDC20	CDC20
	CDC25A	CDC25A
	CDC25C	CDC25C
	CDC27	CDC27
	CDC5L	CDC5L
	CDC6	CDC6
	CDC7	CDC7
	CDH1	CDH1
	CDH6	CDH6
	CDH8	CDH8
	CDK2	CDK2
	CDK5R1	CDK5R1
	CDK6	CDK6
	CDKL1	CDKL1
	CDKL2	CDKL2
	CDT1	CDT1
	CEACAM5	CEACAM5
	CENPA	CENPA
	CENPE	CENPE
	CENPF	CENPF
	CENPI	CENPI
	CEP152	CEP152
	CFTR	CFTR
	CHAF1A	CHAF1A
	CHAF1B	CHAF1B
	CHEK1	CHEK1
	CHRNA6	CHRNA6
	CHUK	CHUK
	CIITA	CIITA
	CLCN5	CLCN5
	CLDN18	CLDN18
	CLEC4M	CLEC4M
	COL14A1	COL14A1
	COL19A1	COL19A1
	COL4A3	COL4A3
	CPA1	CPA1
	CPSF6	CPSF6
	CPT1A	CPT1A
	CR1	CR1
	CREBBP	CREBBP
	CTNND2	CTNND2
	CTSE	CTSE
	CTSG	CTSG
	CUL2	CUL2
	CYP11B1	CYP11B1
	CYP24A1	CYP24A1
	CYP27B1	CYP27B1
	CYP2A6	CYP2A6
	CYP2A7	CYP2A7
	CYP2C9	CYP2C9
	CYP3A4	CYP3A4
	CYP3A7	CYP3A7
	CYP4F2	CYP4F2
	DAZL	DAZL
	DBT	DBT
	DCT	DCT
	DDC	DDC
	DDX51	DDX51
	DDX6	DDX6
	DHFR	DHFR
	DLG1	DLG1
	DLX4	DLX4
	DNMT1	DNMT1
	DSG1	DSG1
	DTNA	DTNA
	DTYMK	DTYMK
	E2F1	E2F1
	EGFR	EGFR
	ELAVL2	ELAVL2
	ELK4	ELK4
	ELOVL6	ELOVL6
	EP300	EP300
	EPB42	EPB42
	EPHA5	EPHA5
	EPHB1	EPHB1
	EPHB2	EPHB2
	EPHB3	EPHB3
	EPYC	EPYC
	ERBB3	ERBB3
	ERBB4	ERBB4
	ERCC2	ERCC2
	ERCC4	ERCC4
	ESPL1	ESPL1
	ESR1	ESR1
	ETV1	ETV1
	ETV3	ETV3
	EXO1	EXO1
	EXPH5	EXPH5
	F2RL3	F2RL3
	FANCC	FANCC
	FANCG	FANCG
	FANCI	FANCI
	FASLG	FASLG
	FBP2	FBP2
	FEV	FEV
	FGB	FGB
	FGFR2	FGFR2
	FGFR4	FGFR4
	FGL1	FGL1
	FLT1	FLT1
	FLT4	FLT4
	FMO3	FMO3
	FOLH1	FOLH1
	FOXM1	FOXM1
	FSHR	FSHR
	FUT3	FUT3
	GAB1	GAB1
	GAD2	GAD2
	GAS2L3	GAS2L3
	GCG	GCG
	GDF11	GDF11
	GFAP	GFAP
	GHRH	GHRH
	GHRHR	GHRHR
	GLP1R	GLP1R
	GLRA3	GLRA3
	GML	GML
	GNAT2	GNAT2
	GPA33	GPA33
	GPD2	GPD2
	GPLD1	GPLD1
	GPR19	GPR19
	GPSM2	GPSM2
	GRIK1	GRIK1
	GRIN2A	GRIN2A
	GRM5	GRM5
	GRP	GRP
	GUCA1A	GUCA1A
	GUCY2C	GUCY2C
	GYPA	GYPA
	GYPB	GYPB
	GYPE	GYPE
	HELLS	HELLS
	HMMR	HMMR
	HNF4A	HNF4A
	HOXB13	HOXB13
	HOXB3	HOXB3
	HOXC11	HOXC11
	HOXD4	HOXD4
	HOXD9	HOXD9
	HSD3B2	HSD3B2
	HTR1B	HTR1B
	HTR1E	HTR1E
	HTR2A	HTR2A
	HTR2C	HTR2C
	HTR4	HTR4
	IFNA1	IFNA1
	IFNA16	IFNA16
	IFNA21	IFNA21
	IFNB1	IFNB1
	IFNW1	IFNW1
	IL17A	IL17A
	IL1A	IL1A
	IL3	IL3
	IL4	IL4
	IL5	IL5
	IL9	IL9
	ISL1	ISL1
	ITGA2	ITGA2
	ITGAD	ITGAD
	ITGB3	ITGB3
	ITIH1	ITIH1
	ITSN1	ITSN1
	KALRN	KALRN
	KCNJ10	KCNJ10
	KCNMA1	KCNMA1
	KIAA0586	KIAA0586
	KIF11	KIF11
	KIF14	KIF14
	KIF23	KIF23
	KIF2C	KIF2C
	KIF4A	KIF4A
	KIFC1	KIFC1
	KISS1	KISS1
	KLK3	KLK3
	KLKB1	KLKB1
	KNG1	KNG1
	KNTC1	KNTC1
	KRT1	KRT1
	KRT2	KRT2
	KRT33B	KRT33B
	KRT76	KRT76
	KRT83	KRT83
	KRT86	KRT86
	LBP	LBP
	LECT2	LECT2
	LIG1	LIG1
	LIG3	LIG3
	LIPC	LIPC
	LIPF	LIPF
	LLGL1	LLGL1
	LMNB1	LMNB1
	LMNB2	LMNB2
	LRP2	LRP2
	LRP6	LRP6
	MAD2L1	MAD2L1
	MAGEA9	MAGEA9
	MAGEC1	MAGEC1
	MAP2	MAP2
	MAPK10	MAPK10
	MATN3	MATN3
	MB	MB
	MC2R	MC2R
	MC5R	MC5R
	MCM3	MCM3
	MCM4	MCM4
	MCM7	MCM7
	MDM2	MDM2
	MDM4	MDM4
	MELK	MELK
	MEP1B	MEP1B
	METAP2	METAP2
	MKI67	MKI67
	MLANA	MLANA
	MLLT10	MLLT10
	MMACHC	MMACHC
	MMP12	MMP12
	MMP16	MMP16
	MNAT1	MNAT1
	MOBP	MOBP
	MON2	MON2
	MPHOSPH9	MPHOSPH9
	MPL	MPL
	MPP2	MPP2
	MPZ	MPZ
	MSH2	MSH2
	MSX2	MSX2
	MTMR7	MTMR7
	MUC1	MUC1
	MUC4	MUC4
	MYB	MYB
	MYBL2	MYBL2
	MYEF2	MYEF2
	MYH3	MYH3
	MYO7A	MYO7A
	NCAPH	NCAPH
	NCOA2	NCOA2
	NEBL	NEBL
	NEK2	NEK2
	NELL2	NELL2
	NF1	NF1
	NGFR	NGFR
	NHLH2	NHLH2
	NOVA1	NOVA1
	NPHP1	NPHP1
	NPR3	NPR3
	NPY2R	NPY2R
	NPY6R	NPY6R
	NR2C1	NR2C1
	NR2F6	NR2F6
	NR6A1	NR6A1
	NRCAM	NRCAM
	NRP2	NRP2
	NTNG2	NTNG2
	NTRK2	NTRK2
	NTRK3	NTRK3
	ODF1	ODF1
	OPCML	OPCML
	OPRM1	OPRM1
	OR2H1	OR2H1
	OR7A5	OR7A5
	PAH	PAH
	PAPPA	PAPPA
	PAX3	PAX3
	PAX6	PAX6
	PAX9	PAX9
	PAXIP1	PAXIP1
	PCM1	PCM1
	PCNA	PCNA
	PDE10A	PDE10A
	PDE3A	PDE3A
	PDE6A	PDE6A
	PDX1	PDX1
	PDZK1	PDZK1
	PHOX2B	PHOX2B
	PHTF2	PHTF2
	PIGR	PIGR
	PIGU	PIGU
	PIK3C2G	PIK3C2G
	PIK3R3	PIK3R3
	PKMYT1	PKMYT1
	PKN2	PKN2
	PLG	PLG
	PLK1	PLK1
	PLK4	PLK4
	PLS1	PLS1
	PNLIPRP1	PNLIPRP1
	PNLIPRP2	PNLIPRP2
	POLA1	POLA1
	POLD1	POLD1
	POLE2	POLE2
	POU6F2	POU6F2
	PPAT	PPAT
	PPM1E	PPM1E
	PPP2R1B	PPP2R1B
	PPP2R5E	PPP2R5E
	PRIM1	PRIM1
	PRKACA	PRKACA
	PRL	PRL
	PRLR	PRLR
	PROX1	PROX1
	PROZ	PROZ
	PRPS1L1	PRPS1L1
	PRTN3	PRTN3
	PSG1	PSG1
	PSPC1	PSPC1
	PTGER3	PTGER3
	PTK7	PTK7
	PTPN21	PTPN21
	PTTG1	PTTG1
	RAD51	RAD51
	RAD51AP1	RAD51AP1
	RAD54L	RAD54L
	RB1	RB1
	RBBP7	RBBP7
	RBBP8	RBBP8
	RBL1	RBL1
	RCC1	RCC1
	RECQL5	RECQL5
	REG1A	REG1A
	REG1B	REG1B
	REL	REL
	RFC3	RFC3
	RFC4	RFC4
	RFC5	RFC5
	RGS7	RGS7
	RIBC2	RIBC2
	RNF8	RNF8
	ROS1	ROS1
	RPH3A	RPH3A
	RPS6KA5	RPS6KA5
	RPS6KB1	RPS6KB1
	RREB1	RREB1
	RRM2	RRM2
	RSC1A1	RSC1A1
	RUNX1T1	RUNX1T1
	RUNX2	RUNX2
	RXRG	RXRG
	RYR3	RYR3
	SCN7A	SCN7A
	SCNN1G	SCNN1G
	SEMA3D	SEMA3D
	SEMA6A	SEMA6A
	SERPINA4	SERPINA4
	SERPINB4	SERPINB4
	SERPINB5	SERPINB5
	SERPINC1	SERPINC1
	SGPP2	SGPP2
	SHMT1	SHMT1
	SHOX	SIM1
	SIM1	SIM2
	SIM2	SIX6
	SIX6	SLC10A1
	SLC10A1	SLC10A2
	SLC10A2	SLC12A3
	SLC12A3	SLC15A1
	SLC15A1	SLC17A1
	SLC17A1	SLC17A3
	SLC17A3	SLC1A2
	SLC1A2	SLC2A1
	SLC2A1	SLC30A3
	SLC30A3	SLC34A1
	SLC34A1	SLC4A4
	SLC4A4	SLC6A2
	SLC6A2	SLC6A4
	SLC6A4	SLC6A5
	SLC6A5	SLC7A2
	SLC7A2	SLC8A1
	SLC8A1	SMAD5
	SMAD5	SMC2
	SMC2	SMC4
	SMC4	SNX9
	SNX9	SOX11
	SOX11	SOX12
	SOX12	SOX2
	SOX2	SOX5
	SOX5	SP1
	SP1	SP4
	SP4	SPAG11B
	SPAG11B	SPAM1
	SPAM1	SPC25
	SPC25	SPRR2C
	SPRR2C	SPTA1
	SPTA1	SSH2
	SSH2	SSTR3
	SSTR3	SSX3
	SSX3	STIL
	STIL	STK4
	STK4	SULT2B1
	SULT2B1	T
	T	TACR1
	TACR1	TAF1
	TAF1	TAF5
	TAF5	TAT
	TAT	TBR1
	TBR1	TBX5
	TBX5	TEP1
	TEP1	TERF1
	TERF1	TERT
	TERT	TFAP2A
	TFAP2A	TFDP1
	TFDP1	TGFBR1
	TGFBR1	THPO
	THPO	THRA
	THRA	TIMELESS
	TIMELESS	TJP1
	TJP1	TK1
	TK1	TLL1
	TLL1	TMEM26
	TMEM26	TMPO
	TMPO	TOP2A
	TOP2A	TOPBP1
	TOPBP1	TP53
	TP53	TPD52
	TPD52	TPO
	TPO	TPX2
	TPX2	TRAIP
	TRAIP	TRH
	TRH	TRIM10
	TRIM10	TRIP13
	TRIP13	TROAP
	TROAP	TRPM1
	TRPM1	TSHB
	TSHB	TSHR
	TSHR	TTF2
	TTF2	TYR
	TYR	UBE2C
	UBE2C	UBE3A
	UBE3A	UGT2B15
	UGT2B15	WDHD1
	VCY1B	WDR62
	WDHD1	WEE1
	WDR62	WISP1
	WEE1	WNT1
	WISP1	WNT10B
	WNT1	WNT2
	WNT10B	WRN
	WNT2	WT1
	WRN	WWOX
	WT1	XDH
	WWOX	XRCC2
	XDH	XYLB
	XRCC2	ZKSCAN3
	XYLB	ZMYND8
	ZKSCAN3	ZNF157
	ZMYND8	ZNF37A
	ZNF157	ZNF79
	ZNF37A	ZP2
	ZNF79	ZWINT
	ZP2
	ZWINT
